# Supplementary material for: Significant Differences in Host-Pathogen Interactions Between Murine and Human Whole Blood
Source: PubMed Central journal article supplement (PMC7843371; doi:10.3389/fimmu.2020.565869), 2021-01-15
Supplement: DataSheet_1.pdf [file DataSheet_1.pdf]

## Supplementary Material

### 1 Supplementary Figures

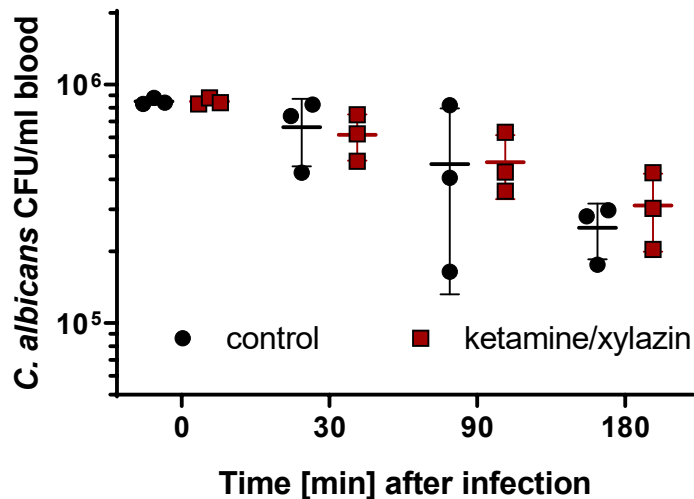

**Supplementary Figure 1. Effect of ketamine and xylazine on *C. albicans* killing in the human whole-blood model.** Blood from healthy human volunteers was left untreated (control, black circle) or 40  $\mu\text{g/ml}$  ketamine and 2  $\mu\text{g/ml}$  xylazine (ketamine/xylazine, red square) were added just before infection with *C. albicans*. Samples collected at the indicated time points were plated in serial dilution and CFU were quantified. Three experiments using different donors were performed with the control and ketamine/xylazine treatment performed in parallel. Mean  $\pm$  standard deviation are indicated by the lines. Statistical analysis was performed by paired, two-tailed t test comparing control and ketamine/xylazine for each time point and showed no significant difference between the groups.

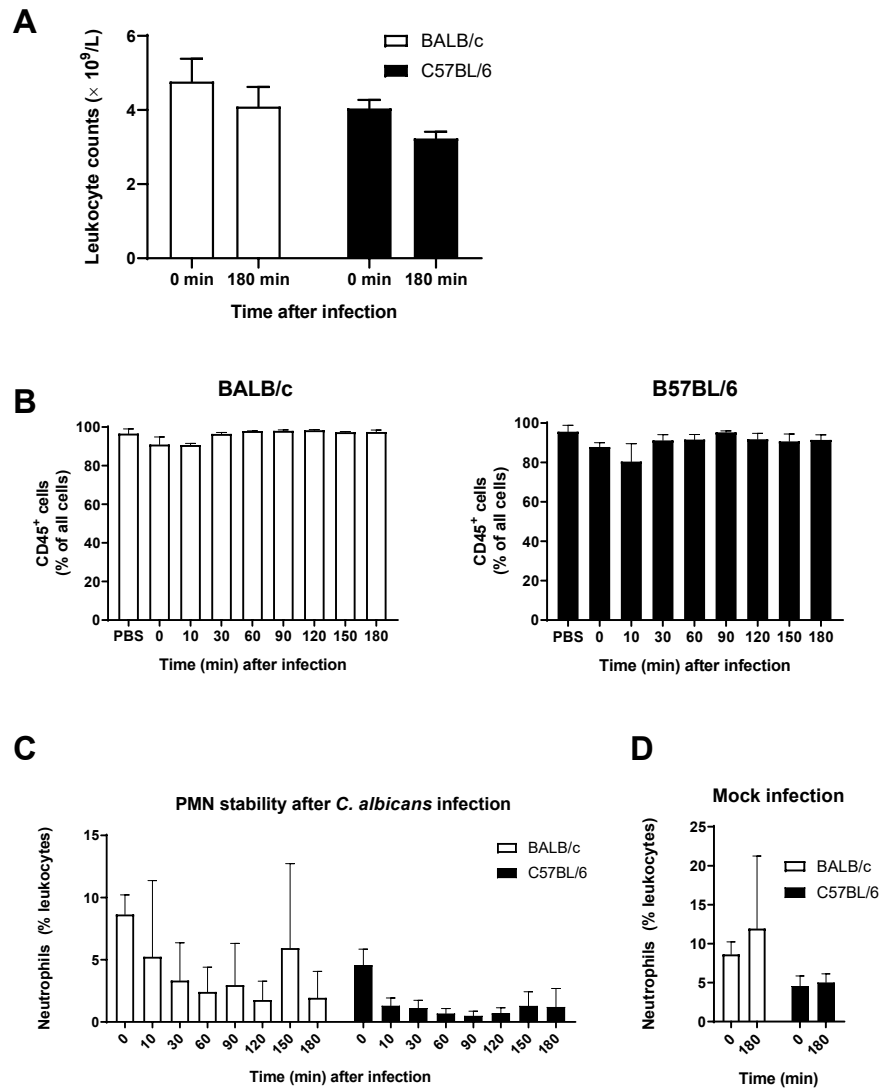

**Supplementary Figure 2. Immune cell numbers in infected murine whole blood.** (A) Total leukocyte counts were determined with an automated hematology analyzer. Changes over time were not statistically significant (unpaired t test corrected for multiple comparisons using the Holm-Sidak method). (B) The relative numbers of CD45<sup>+</sup> cells in blood were measured by flow cytometry. (C, D) Relative numbers of neutrophils (Ly6G<sup>+</sup>/CD11b<sup>+</sup>) in infected blood (C) and blood mock-infected with PBS (D) measured by flow cytometry. Data from three independent experiments is presented as mean  $\pm$  standard deviation in each graph.

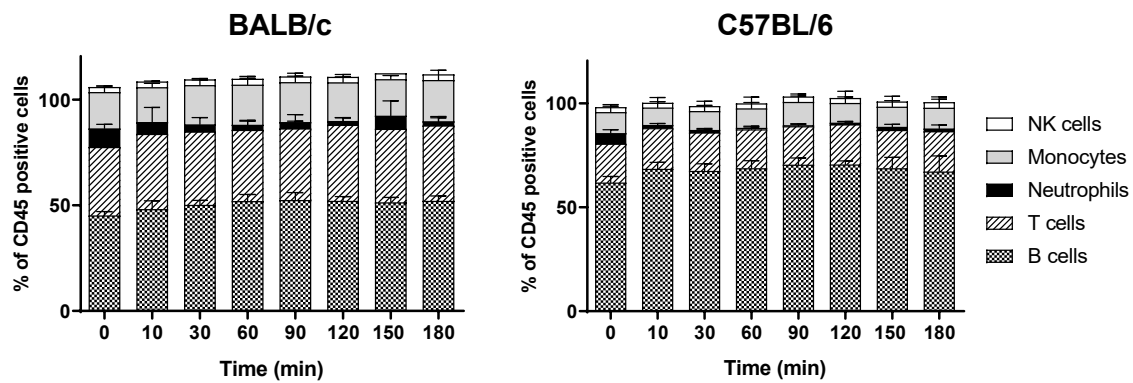

**Supplementary Figure 3. Immune cell stability in murine whole blood upon exposure to *Candida*.** Cell populations were measured by flow cytometry following *ex vivo* *C. albicans* infection of blood from BALB/c (A) and C57BL/6 mice (B). Statistical analysis was performed by unpaired, two-tailed t test.

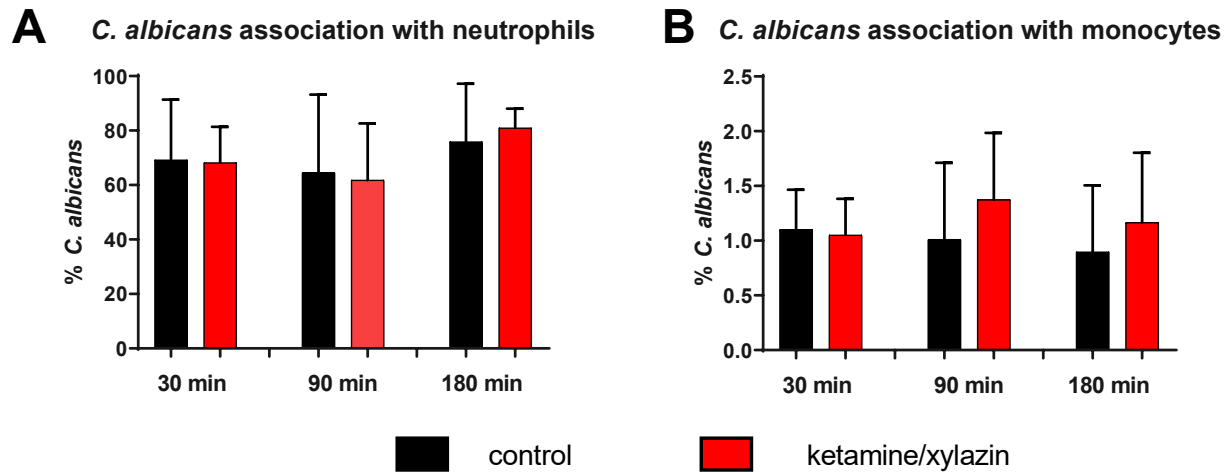

**Supplementary Figure 4. Effect of ketamine and xylazine on association of *C. albicans* with neutrophils and monocytes in the human whole-blood model.** Blood from healthy human volunteers was left untreated (control, black) or 40  $\mu\text{g/ml}$  ketamine and 2  $\mu\text{g/ml}$  xylazine (ketamine/xylazine, red) were added just before infection with *C. albicans*. Samples collected at the indicated time points were analyzed by flow cytometry. Three experiments using different donors were performed with the control and ketamine/xylazine treatment performed in parallel. The percentage of GFP-expressing *Candida* binding to immune cells of blood was calculated relative to total *C. albicans* cells in infected blood (set to 100 %) during a time course of three hours and is depicted as mean  $\pm$  standard deviation. Statistical analysis was performed by paired, two-tailed t test comparing control and ketamine/xylazine for each time point and showed no significant difference between the groups.

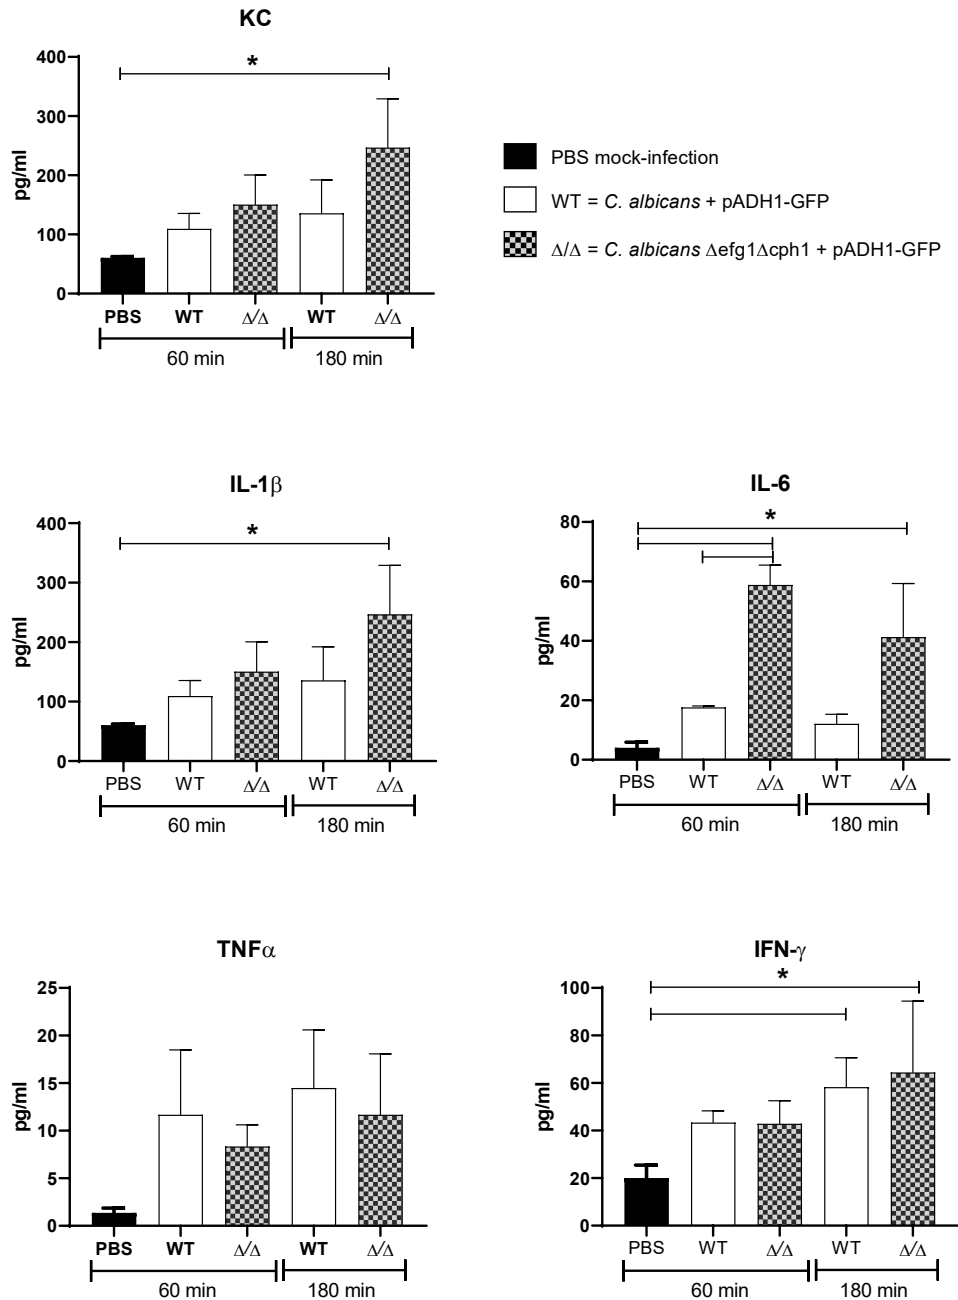

**Supplementary Figure 5. Cytokine response to *C. albicans* infection in murine blood.** Blood from BALB/c mice was infected with GFP-expressing *C. albicans* wild type (white) or *efg1 $\Delta$ cph1 $\Delta$*  double mutant (grey, square pattern). PBS-mock infection served as control. Cytokines were quantified in plasma at the indicated time points. Asterisks indicate significant differences ( $p < 0.05$ ; 1-Way ANOVA and Holm-Sidak's multiple comparison test for comparison of infected to control blood; unpaired, two-tailed t test for comparison of the two strains at one time point). Mean  $\pm$  standard deviation of two to three independent experiments are shown.

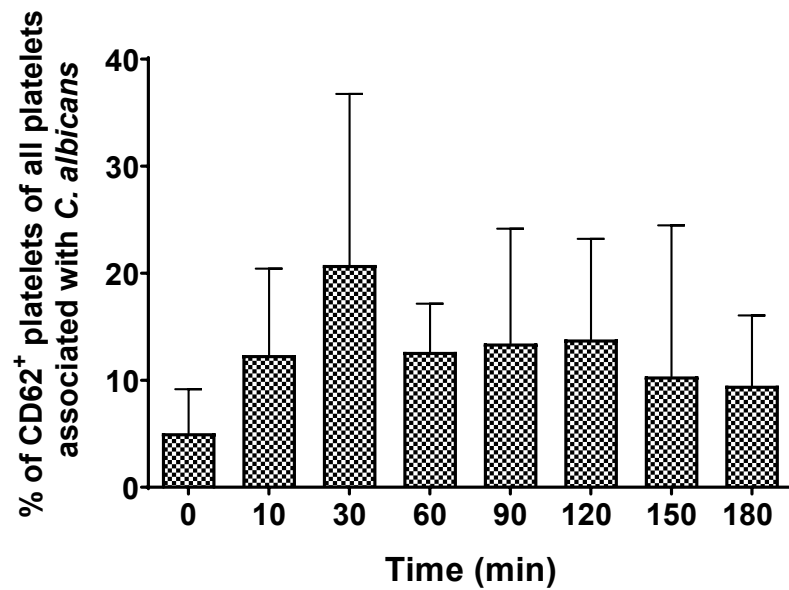

**Supplementary Figure 6. Numbers of CD62-activated platelets associated with *C. albicans* during the time of infection.** Cells were differentially stained in whole blood and activated platelets (CD41<sup>+</sup> CD62<sup>+</sup>) that were also positive for GFP were included in the analysis. Activated platelets are shown in relative amounts to all positive platelets (CD41<sup>+</sup>).

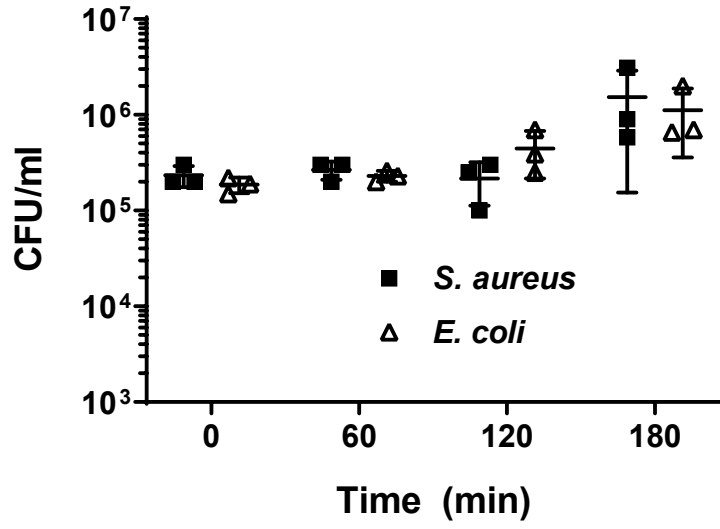

**Supplementary Figure 7. Bacterial survival in murine whole blood at lower infection dose.** Colony forming units of *S. aureus* and *E. coli* were determined from infected murine blood. All values correspond to the means of three independent experiments with pooled whole-blood from 10 BALB/c mice infected *ex vivo* with  $1 \times 10^5$ /ml of GFP-expressing bacteria. Each dot represents the mean of an independent experiment +/- standard deviation (n=3).
